# Supplementary material for: Mesoporous silica–carbon composites fabricated by a universal strategy of hydrothermal carbonization: controllable synthesis and applications
Source: Royal Society of Chemistry journal article supplement (doi:10.1039/c8ra04641g), 2018-01-01
Supplement: c8ra04641g1.pdf [file c8ra04641g1.pdf]

## Supporting Information

### **Mesoporous silica-carbon composites fabricated by a universal strategy of hydrothermal carbonization: controllable synthesis and applications**

Xitong Sun,<sup>a,†</sup> Wei Yu,<sup>a,†</sup> Jingyu Yan,<sup>a</sup> Jiaqi Li,<sup>a,b</sup> Gaowa Jin,<sup>a</sup> Jiatao Feng,<sup>a</sup> Zhimou Guo,<sup>\*a</sup> and Xinmiao Liang<sup>\*a</sup>

<sup>a</sup> Key Lab of Separation Science for Analytical Chemistry, Dalian Institute of Chemical Physics, Chinese Academy of Sciences, Dalian, Liaoning 116023, China

E-mail: guozhimou@dicp.ac.cn (Z. Guo); liangxm@dicp.ac.cn (X. Liang)

<sup>b</sup> University of Chinese Academy of Sciences, Beijing 100149, China

† These authors contributed equally to this work.

Figure S1

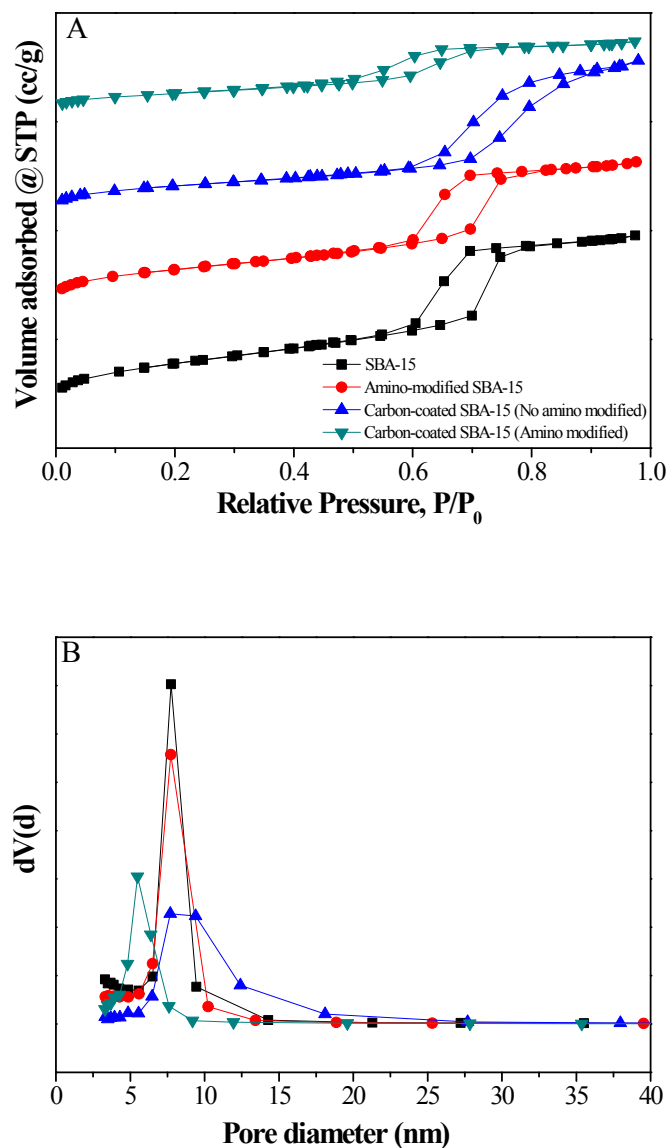

Fig. S1 Nitrogen adsorption/desorption isotherms (A) and pore size distributions (B) of SBA-15, SBA-15-NH<sub>2</sub> and carbon-coated SBA-15 (amino modified and no amino-modified).

Figure S2

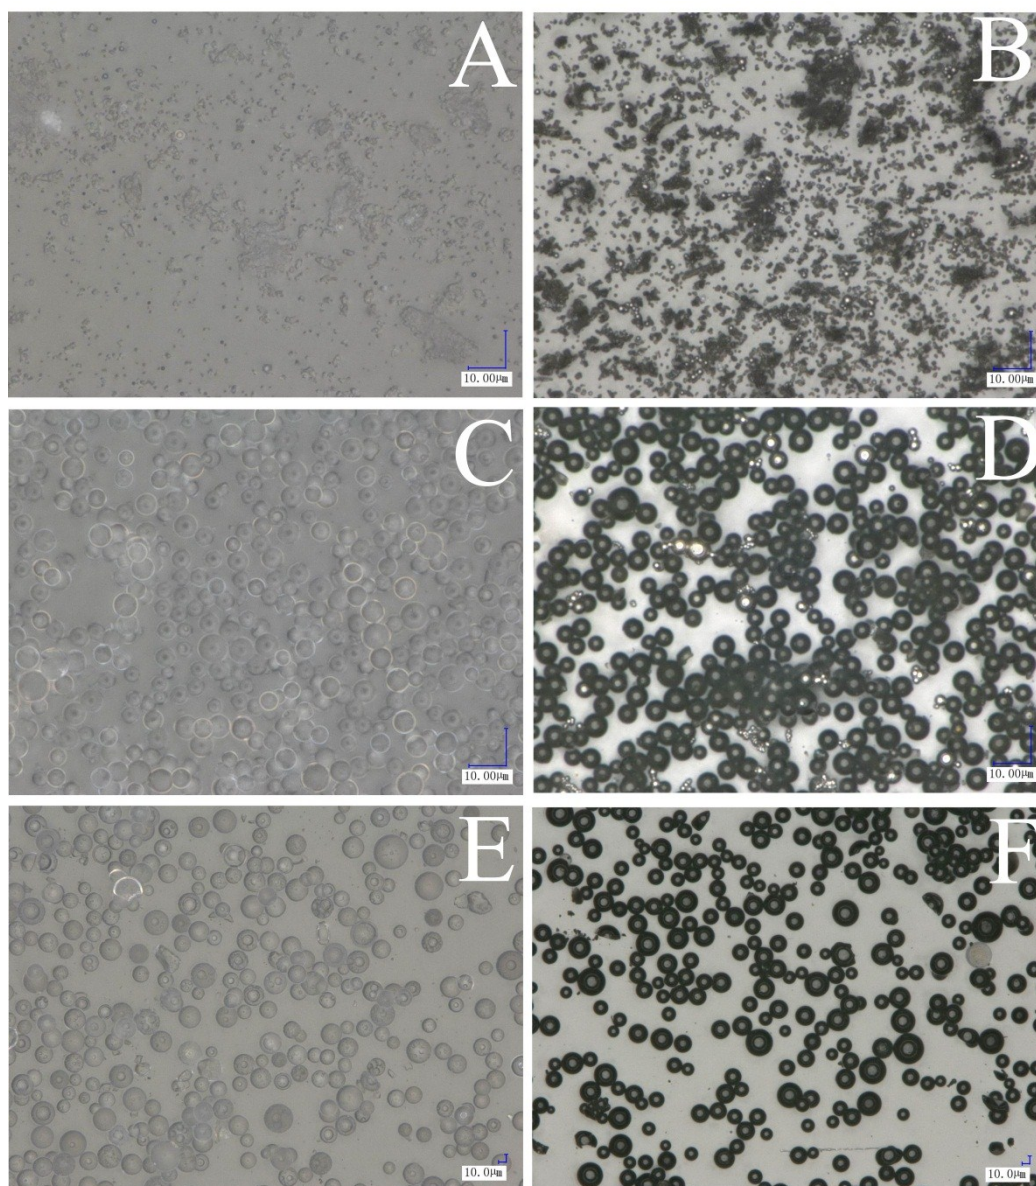

Fig. 2 The optical microscope images of SBA-15 (A, before; B, after) and spherical silica gels with particle sizes of 5 (C, before; D, after) and 30  $\mu\text{m}$  (E, before; F, after) before and after the coating of carbon layer, and the scale bars were 10  $\mu\text{m}$ .

Figure S3

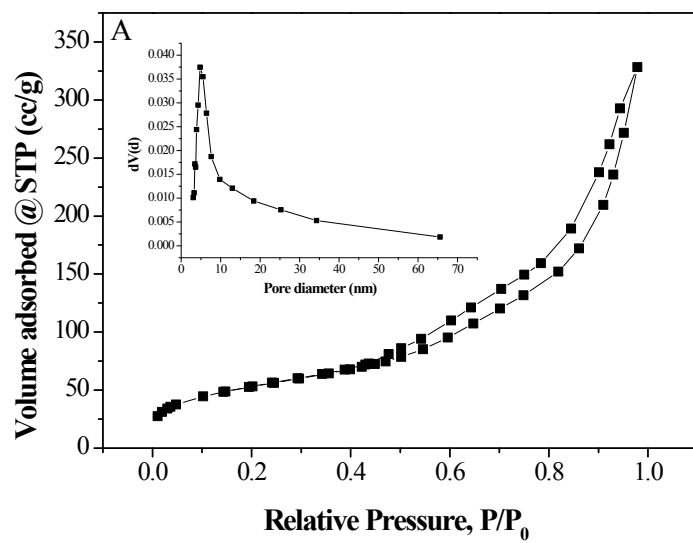

Fig. S3 Nitrogen adsorption/desorption isotherm of SBA-15-C at the SBA-15/glucose ratio of 1:0.1, the insert shows the pore size distribution.

Figure S4

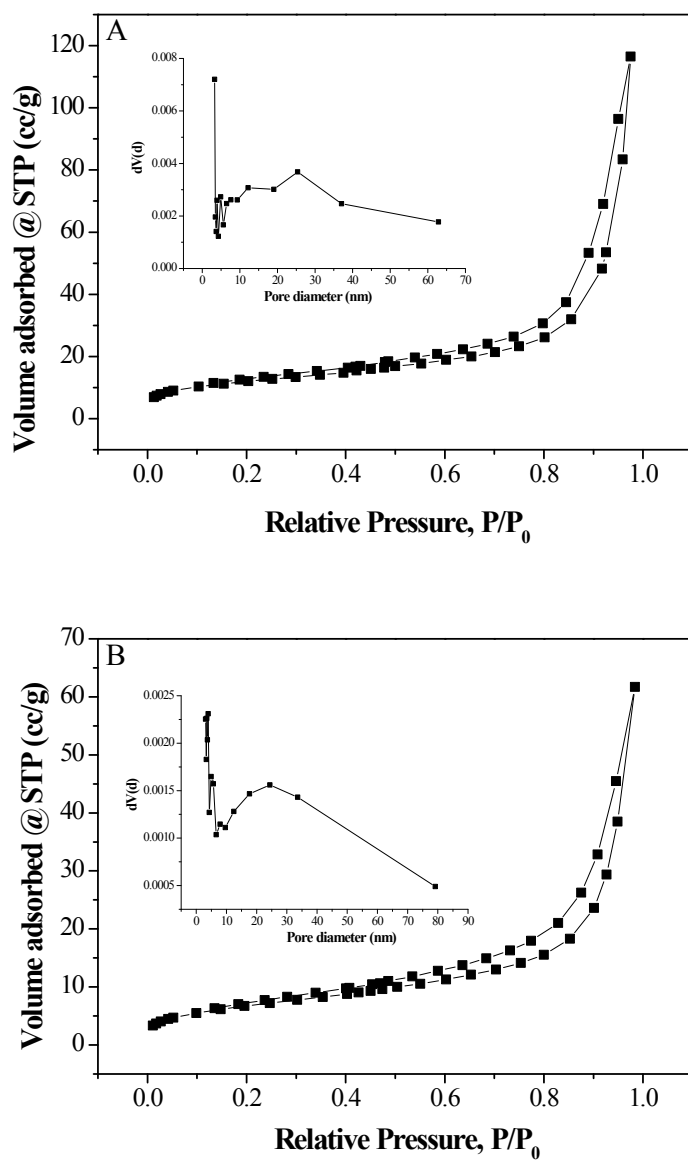

Fig. S4 Nitrogen adsorption/desorption isotherms of SBA-15 (A) and SBA-15-NH<sub>2</sub> (B) after hydrothermal treatment, the insert shows the pore size distributions of the corresponding samples.

Figure S5

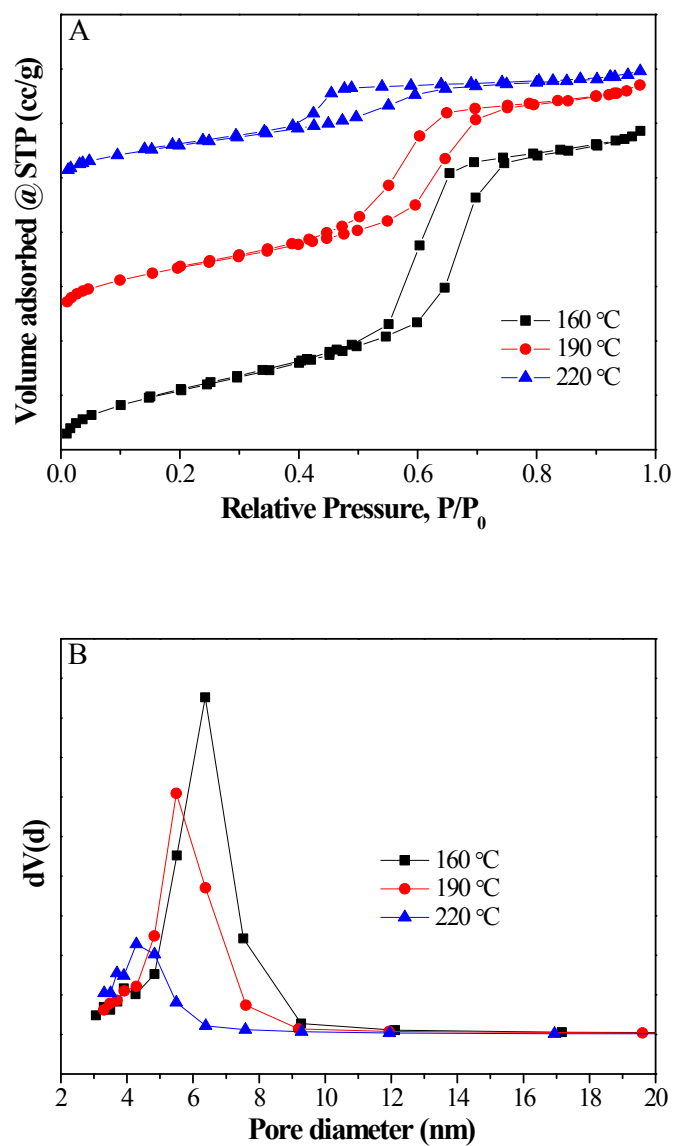

Fig. S5 Nitrogen adsorption/desorption isotherms (A) and pore size distributions (B) of SBA-15-C at different hydrothermal treatment temperature.

Figure S6

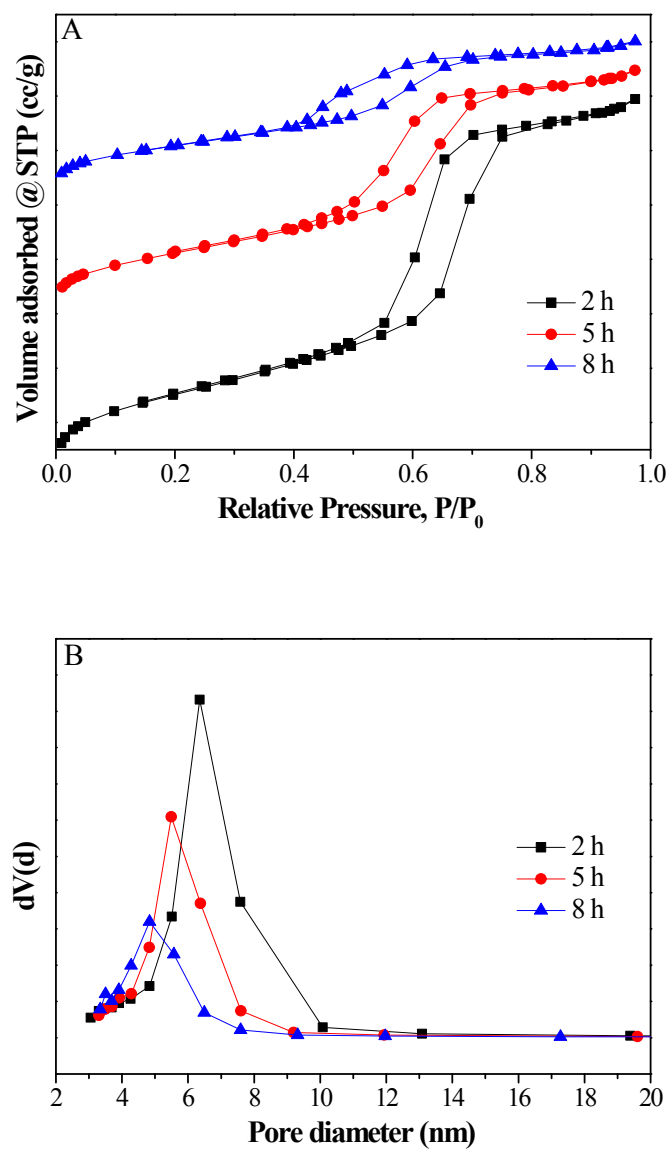

Fig. S6 Nitrogen adsorption/desorption isotherms (A) and pore size distributions (B) of SBA-15-C at different hydrothermal treatment time.

**Figure S7**

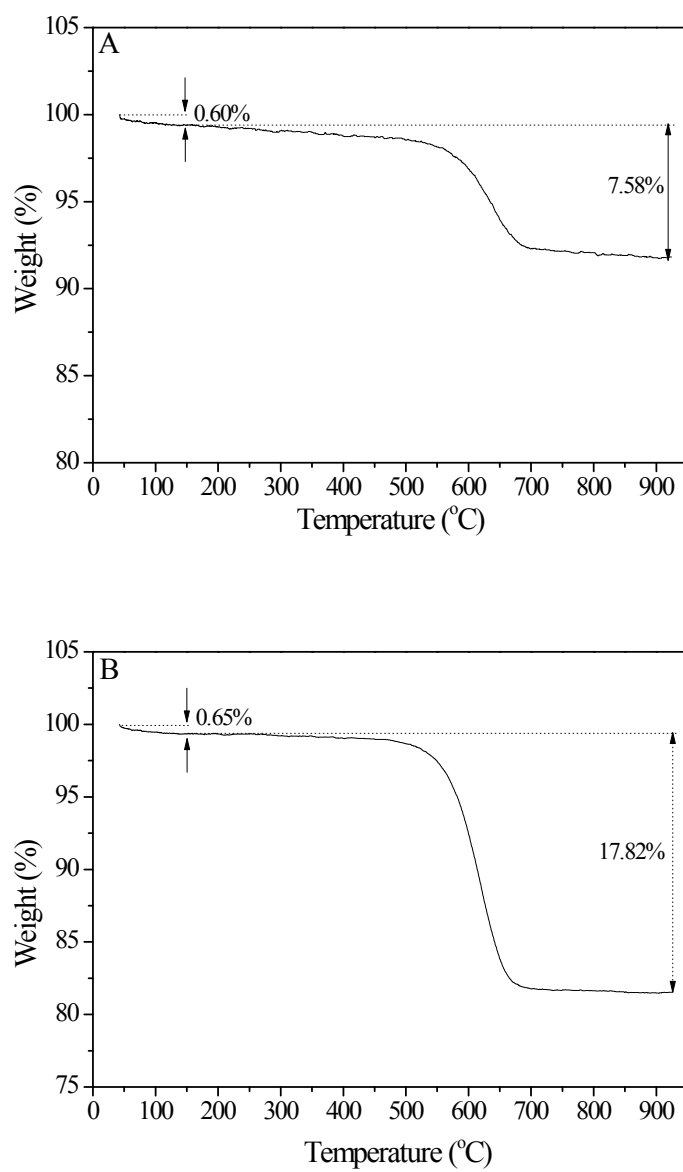

Fig. S7 TGA curves of (A) SBA-15-C(1:0.5) and (B) SiO<sub>2</sub>-C(30 μm).



Figure S8

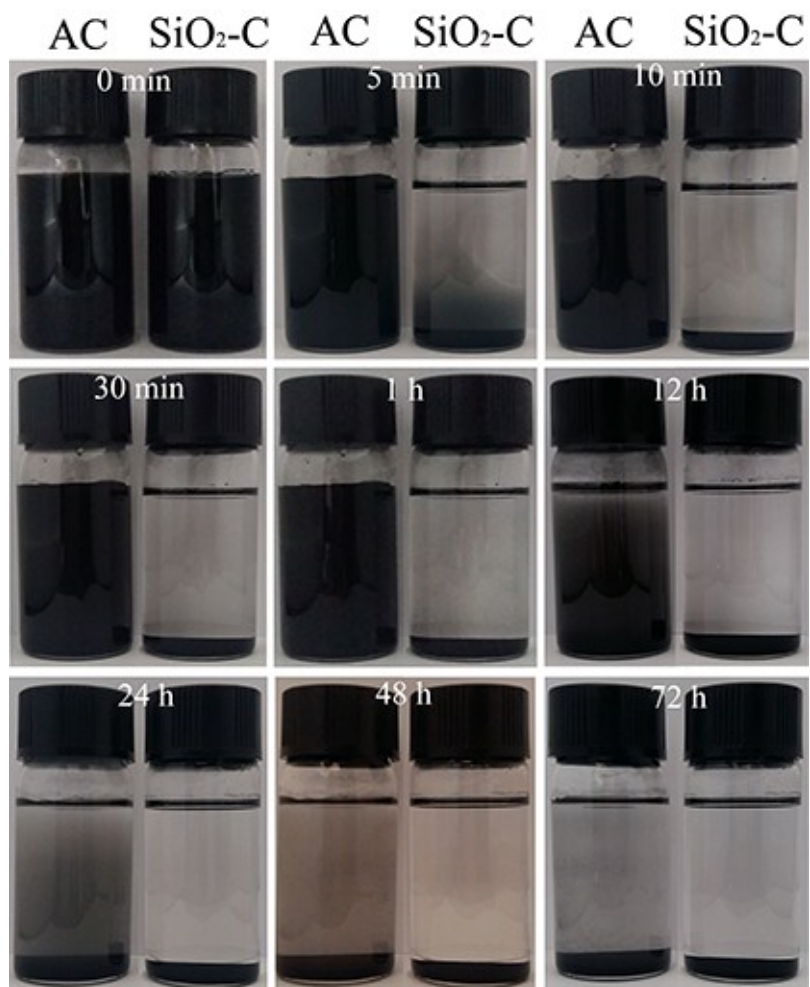

Fig. S8 The images of sedimentation of SiO<sub>2</sub>-C(30 μm) at different time.

Figure S9

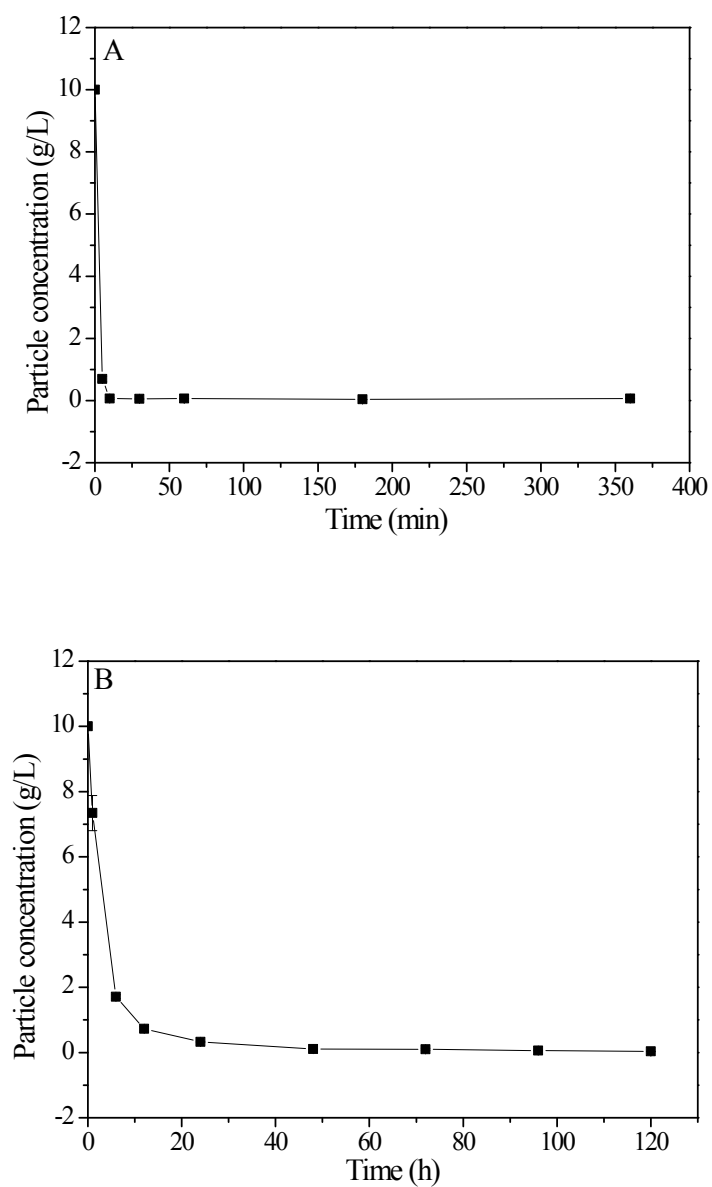

Fig. S9 Sedimentation of (A) SiO<sub>2</sub>-C(30 μm) and (B) activated carbon in aqueous solution, the samples were collected from the middle of the beakers.

**Table S1**

Table S1 Textual properties and elemental analysis of samples

| Samples                                                          | $S_{\text{BET}}$<br>( $\text{m}^2/\text{g}$ ) | $S_{\text{mic}}^{\text{a)}$<br>( $\text{m}^2/\text{g}$ ) | $S_{\text{meso}}^{\text{b)}$<br>( $\text{m}^2/\text{g}$ ) | $V_{\text{t}}$<br>( $\text{cm}^3/\text{g}$ ) | $V_{\text{mic}}^{\text{a)}$<br>( $\text{cm}^3/\text{g}$ ) | $V_{\text{meso}}^{\text{b)}$<br>( $\text{cm}^3/\text{g}$ ) | $d_{\text{BJH}}$<br>(nm) | C<br>(wt%) | N<br>(wt%) | H<br>(wt%) | Carbon<br>layer content<br>(wt%) | Silica<br>content<br>(wt%) |
|------------------------------------------------------------------|-----------------------------------------------|----------------------------------------------------------|-----------------------------------------------------------|----------------------------------------------|-----------------------------------------------------------|------------------------------------------------------------|--------------------------|------------|------------|------------|----------------------------------|----------------------------|
| SBA-15                                                           | 614                                           | 92                                                       | 522                                                       | 0.90                                         | 0.04                                                      | 0.86                                                       | 7.74                     | 1.09       | 0.083      | 1.08       | —                                | —                          |
| SBA-15-NH <sub>2</sub>                                           | 434                                           | 14                                                       | 420                                                       | 0.72                                         | 0.00                                                      | 0.72                                                       | 7.72                     | 4.27       | 1.72       | 1.51       | —                                | —                          |
| SBA-15-C (1:0.1) <sup>c)</sup>                                   | 191                                           | 20                                                       | 171                                                       | 0.51                                         | 0.01                                                      | 0.50                                                       | 4.81                     | 0.61       | 0.17       | 0.00       | —                                | —                          |
| SBA-15-C (1:0.5) <sup>c)</sup>                                   | 331                                           | 49                                                       | 282                                                       | 0.62                                         | 0.02                                                      | 0.60                                                       | 6.39                     | 5.76       | 0.47       | 0.08       | 7.58                             | 91.82                      |
| SBA-15-C (1:1) <sup>c)</sup>                                     | 297                                           | 40                                                       | 257                                                       | 0.48                                         | 0.02                                                      | 0.46                                                       | 6.49                     | 11.71      | 0.48       | 0.56       | 20.78                            | 77.19                      |
| SBA-15-C (1:3) <sup>c)</sup>                                     | 326                                           | 77                                                       | 249                                                       | 0.40                                         | 0.04                                                      | 0.36                                                       | 5.49                     | 23.46      | 0.67       | 0.66       | 32.20                            | 65.39                      |
| SBA-15-C (1:5) <sup>c)</sup>                                     | 356                                           | 146                                                      | 210                                                       | 0.32                                         | 0.06                                                      | 0.26                                                       | 4.82                     | 29.88      | 0.50       | 1.11       | 36.68                            | 61.44                      |
| SBA-15-C (1:7) <sup>c)</sup>                                     | 342                                           | 131                                                      | 211                                                       | 0.32                                         | 0.06                                                      | 0.26                                                       | 4.87                     | 31.53      | 0.52       | 0.75       | 39.51                            | 57.45                      |
| SBA-15-C(160 °C) <sup>d)</sup>                                   | 330                                           | 35                                                       | 295                                                       | 0.51                                         | 0.02                                                      | 0.49                                                       | 6.37                     | 7.63       | 0.42       | 0.35       | 16.49                            | 81.87                      |
| SBA-15-C(220 °C) <sup>d)</sup>                                   | 346                                           | 170                                                      | 176                                                       | 0.26                                         | 0.07                                                      | 0.19                                                       | 4.28                     | 28.36      | 0.64       | 0.79       | 37.80                            | 59.35                      |
| SBA-15-C(2 h) <sup>e)</sup>                                      | 382                                           | 55                                                       | 327                                                       | 0.59                                         | 0.02                                                      | 0.57                                                       | 6.35                     | 10.65      | 0.58       | 0.16       | 18.52                            | 79.59                      |
| SBA-15-C(8 h) <sup>e)</sup>                                      | 392                                           | 201                                                      | 191                                                       | 0.32                                         | 0.09                                                      | 0.23                                                       | 4.83                     | 32.80      | 0.60       | 0.68       | 39.74                            | 57.15                      |
| SBA-15-C (400 °C) <sup>f)</sup>                                  | 415                                           | 191                                                      | 224                                                       | 0.41                                         | 0.09                                                      | 0.32                                                       | 5.53                     | 26.90      | 0.81       | 1.52       | 43.43                            | 52.60                      |
| SBA-15-C (600 °C) <sup>f)</sup>                                  | 455                                           | 200                                                      | 255                                                       | 0.46                                         | 0.09                                                      | 0.37                                                       | 5.52                     | 22.53      | 0.77       | 1.13       | 32.82                            | 63.96                      |
| SiO <sub>2</sub> -C (5 μm) <sup>g)</sup>                         | 286                                           | 80                                                       | 206                                                       | 0.53                                         | 0.04                                                      | 0.49                                                       | 9.16                     | 18.37      | 0.40       | 0.42       | 21.19                            | 77.48                      |
| SiO <sub>2</sub> -C (30 μm) <sup>h)</sup>                        | 286                                           | 109                                                      | 177                                                       | 0.45                                         | 0.05                                                      | 0.40                                                       | 9.29                     | 15.13      | 0.54       | 0.35       | 17.82                            | 81.53                      |
| SBA-15-C(1:3) <sup>i)</sup><br>No amino modification             | 432                                           | 152                                                      | 280                                                       | 0.81                                         | 0.07                                                      | 0.74                                                       | 7.69                     | —          | —          | —          | —                                | —                          |
| SBA-15-C(1:3) eluted by<br>NaOH                                  | 758                                           | 167                                                      | 591                                                       | 0.58                                         | 0.08                                                      | 0.50                                                       | 3.69                     | —          | —          | —          | —                                | —                          |
| SBA-15 <sup>j)</sup><br>(Hydrothermal treatment)                 | 43                                            | —                                                        | —                                                         | 0.18                                         | —                                                         | —                                                          | 3.29                     | —          | —          | —          | —                                | —                          |
| SBA-15-NH <sub>2</sub> <sup>j)</sup><br>(Hydrothermal treatment) | 25                                            | —                                                        | —                                                         | 0.10                                         | —                                                         | —                                                          | 3.95                     | —          | —          | —          | —                                | —                          |
| SBA-15-HC(1:5) <sup>k)</sup>                                     | 121                                           | 16                                                       | 105                                                       | 0.13                                         | 0.01                                                      | 0.12                                                       | 4.28                     | —          | —          | —          | —                                | —                          |
| SBA-15-HC(1:7) <sup>k)</sup>                                     | 82                                            | 12                                                       | 70                                                        | 0.08                                         | 0.01                                                      | 0.07                                                       | 4.31                     | —          | —          | —          | —                                | —                          |

<sup>a)</sup> Micropore surface area ( $S_{\text{mic}}$ ) and volume ( $V_{\text{micro}}$ ) obtained using the t-plot method; <sup>b)</sup> Mesopore surface area ( $S_{\text{meso}}$ ) and volume ( $V_{\text{meso}}$ ) obtained using:  $S_{\text{meso}}=S_{\text{BET}}-S_{\text{mic}}$ ,  $V_{\text{meso}}=V_{\text{t}}-V_{\text{mic}}$ ; <sup>c)</sup> Preparation conditions: hydrothermal treatment temperature, 190 °C; hydrothermal treatment time, 5 h; the mass ratio of SBA-15 to glucose, 1:0.1-1:7; calcination temperature, 800 °C and calcination time, 3 h; <sup>d)</sup>

Preparation conditions: hydrothermal treatment temperature, 160 and 220 °C; hydrothermal treatment time, 5 h; the mass ratio of SBA-15 to glucose, 1:3; calcination temperature, 800 °C and calcination time, 3 h; <sup>e)</sup> Preparation conditions: hydrothermal treatment temperature, 190 °C; hydrothermal treatment time, 2 and 8 h; the mass ratio of SBA-15 to glucose, 1:3; calcination temperature, 800 °C and calcination time, 3 h; <sup>f)</sup> Preparation conditions: hydrothermal treatment temperature, 190 °C; hydrothermal treatment time, 5 h; the mass ratio of SBA-15 to glucose, 1:3; calcination temperature, 400 and 600 °C and calcination time, 3 h; <sup>g)</sup> Preparation conditions: hydrothermal treatment temperature, 190 °C; hydrothermal treatment time, 5 h; the mass ratio of SiO<sub>2</sub> to glucose, 1:3; calcination temperature, 800 °C and calcination time, 3 h; <sup>h)</sup> Preparation conditions: hydrothermal treatment temperature, 190 °C; hydrothermal treatment time, 8 h; the mass ratio of SiO<sub>2</sub> to glucose, 1:1; calcination temperature, 800 °C and calcination time, 3 h; <sup>i)</sup> Sample prepared from no amino-modified SBA-15; <sup>j)</sup> SBA-15 and amino-modified SBA-15 (SBA-15-NH<sub>2</sub>) treated under 190 °C with no adding of glucose; <sup>k)</sup> Hydrothermal carbon layer-coated SBA-15 (SBA-15-HC) with the SBA-15/glucose ratios of 1:5 and 1:7.

## Table S2

Table S2 Cell parameter ( $a_0$ ) and pore wall thickness (W) of SBA-15 and SBA-15-C under different substrate proportions.

| Parameter           | Samples |                   |                   |                   |                   |
|---------------------|---------|-------------------|-------------------|-------------------|-------------------|
|                     | SBA-15  | SBA-15-C<br>(1:1) | SBA-15-C<br>(1:3) | SBA-15-C<br>(1:5) | SBA-15-C<br>(1:7) |
| $a_0^a$ (nm)        | 10.99   | 10.36             | 10.36             | 10.17             | 10.26             |
| W <sup>b</sup> (nm) | 3.25    | 3.87              | 4.87              | 5.35              | 5.39              |

<sup>a</sup>)  $a_0$  calculated on the basis of the SAXS patterns; <sup>b</sup>) W obtained by  $W=a_0-d_{BHH}$ .

**Table S3**

Table S3 The structural information of oligosaccharide isomers.

| Isomers   | Structural formula                                                                                                   | Molecular weight (Da) | Structural diagram |
|-----------|----------------------------------------------------------------------------------------------------------------------|-----------------------|--------------------|
| LNFP-I    | $\text{Fuc}\alpha 1-2\text{Gla}\beta 1-3\text{GlcNAc}\beta 1-3\text{Gla}\beta 1-4\text{Glc}$                         | 853.31                |                    |
| LNFP-II   | $(\text{Fuc}\alpha 1-4)\text{Gla}\beta 1-3\text{GlcNAc}\beta 1-3\text{Gla}\beta 1-4\text{Glc}$                       | 853.31                |                    |
| LNnDFH-II | $\text{Gla}\beta 1-4(\text{Fuc}\alpha 1-3)\text{GlcNAc}\beta 1-3\text{Gla}\beta 1-4(\text{Fuc}\alpha 1-3)\text{Glc}$ | 999.36                |                    |
| LNDFH-I   | $\text{Fuc}\alpha 1-2\text{Gal}\beta 1-3(\text{Fuc}\alpha 1-4)\text{GlcNAc}\beta 1-3\text{Gal}\beta 1-4\text{Glc}$   | 999.36                |                    |

●) Glucose; ●) Galactose; ■) N-acetylglucosamine; ▲) Fucose
